# Supplementary material
Source: PubMed Central journal article supplement (PMC3926432)

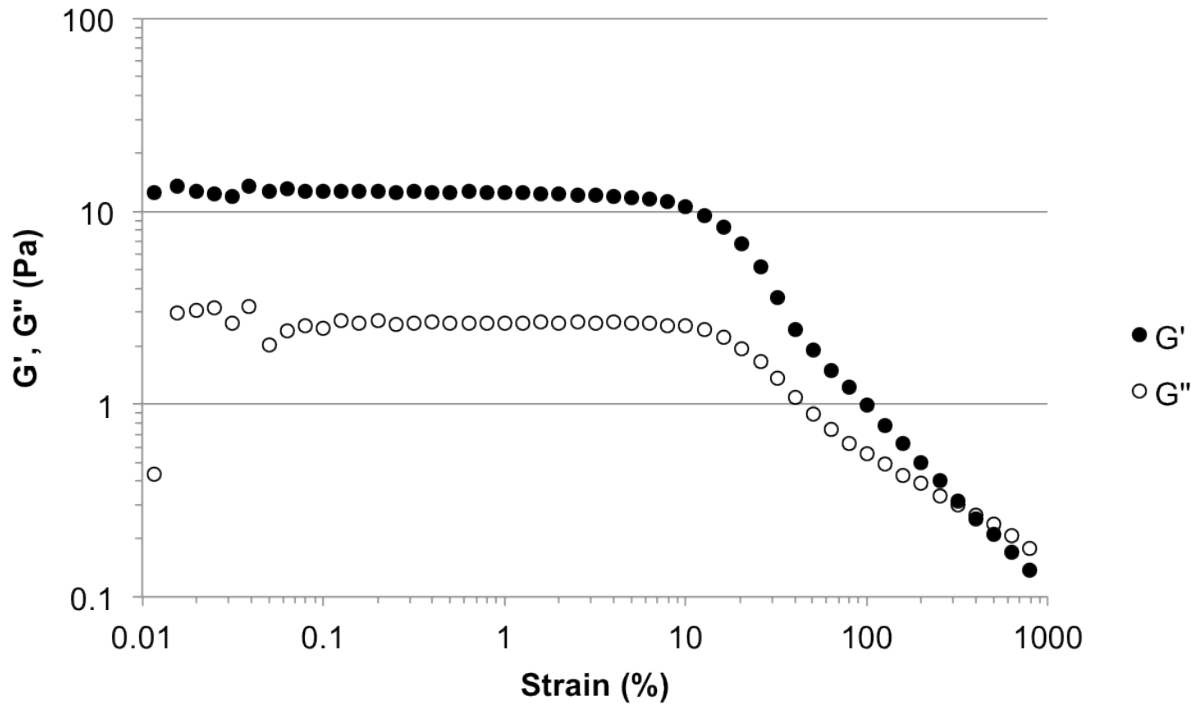

Supplement: NIHMS429090-supplement-Supplemental_Figure_1.pdf [file NIHMS429090-supplement-Supplemental_Figure_1.pdf]

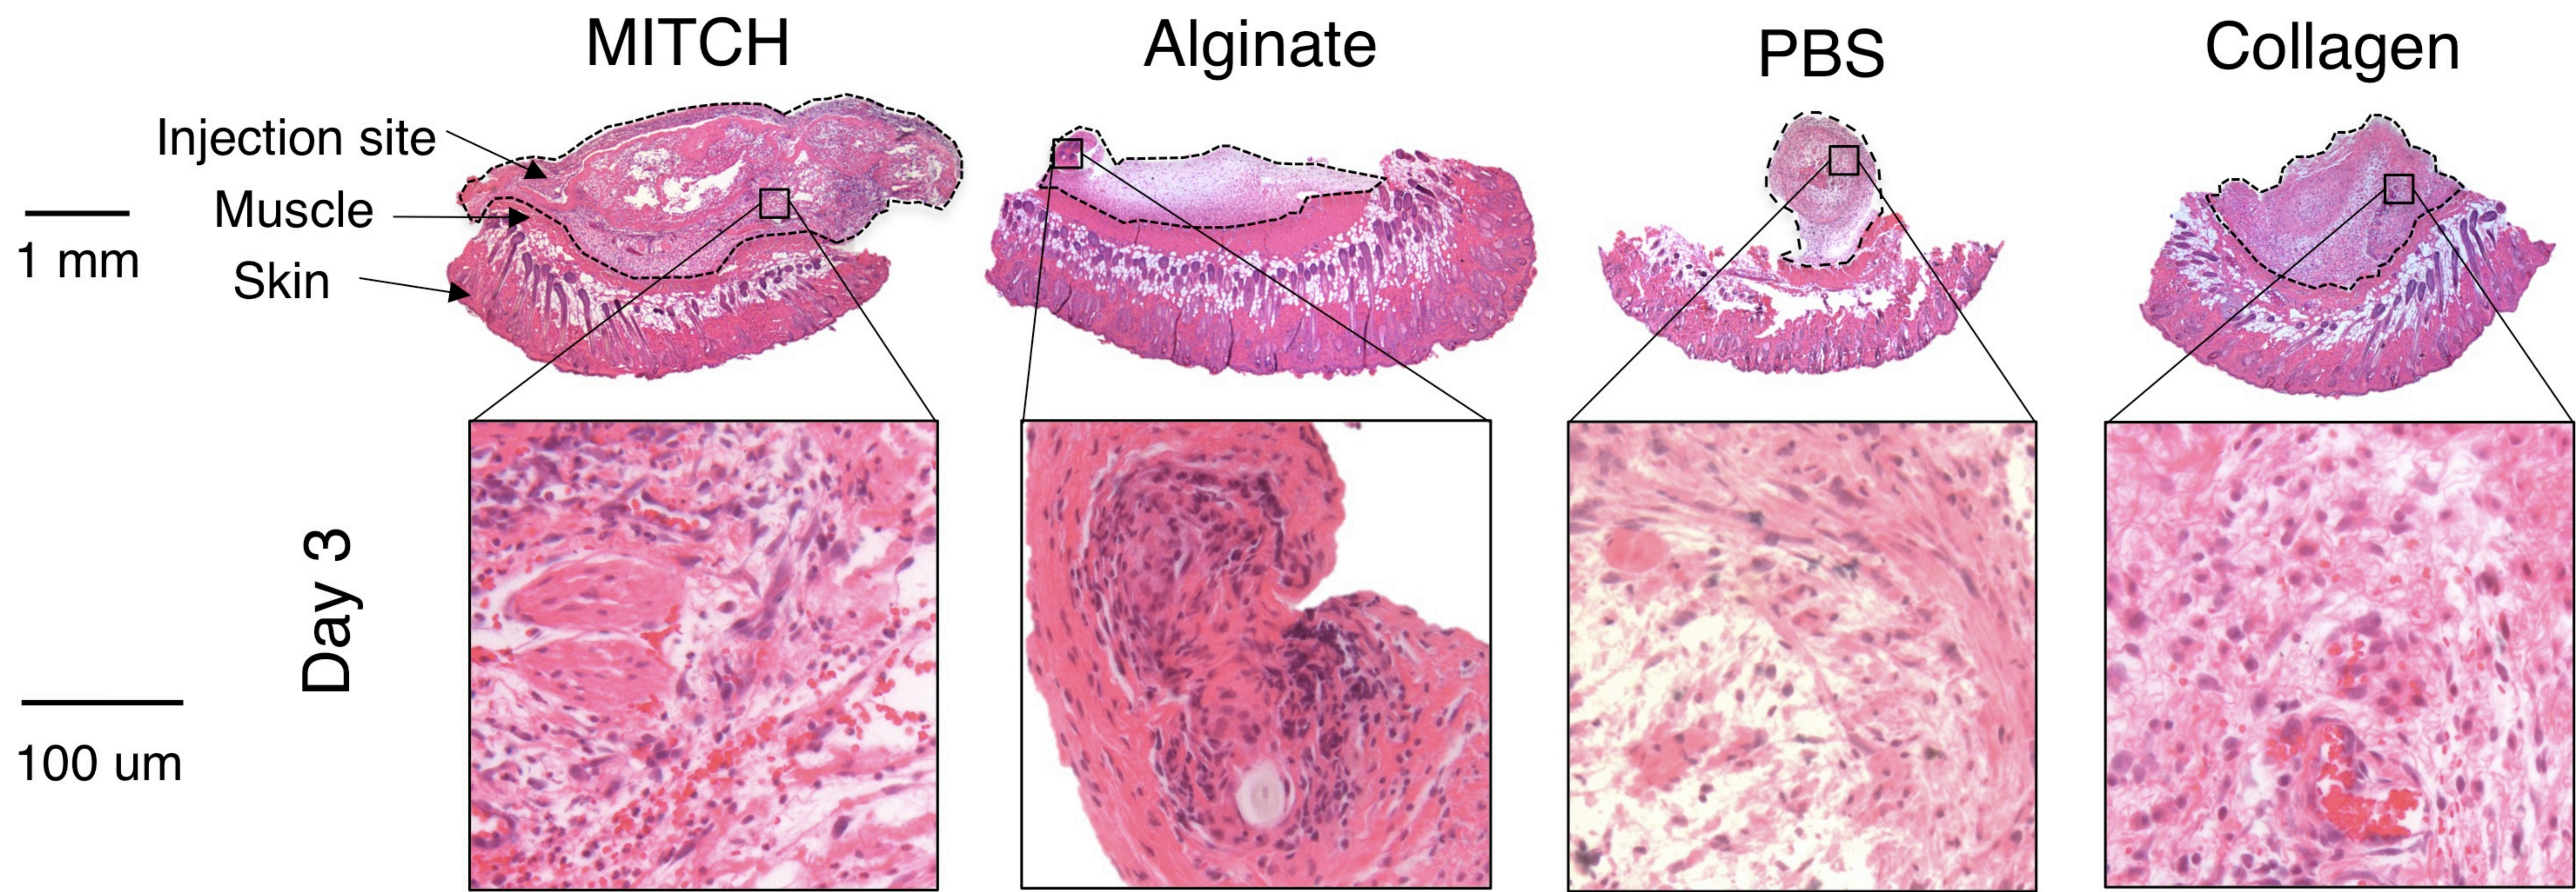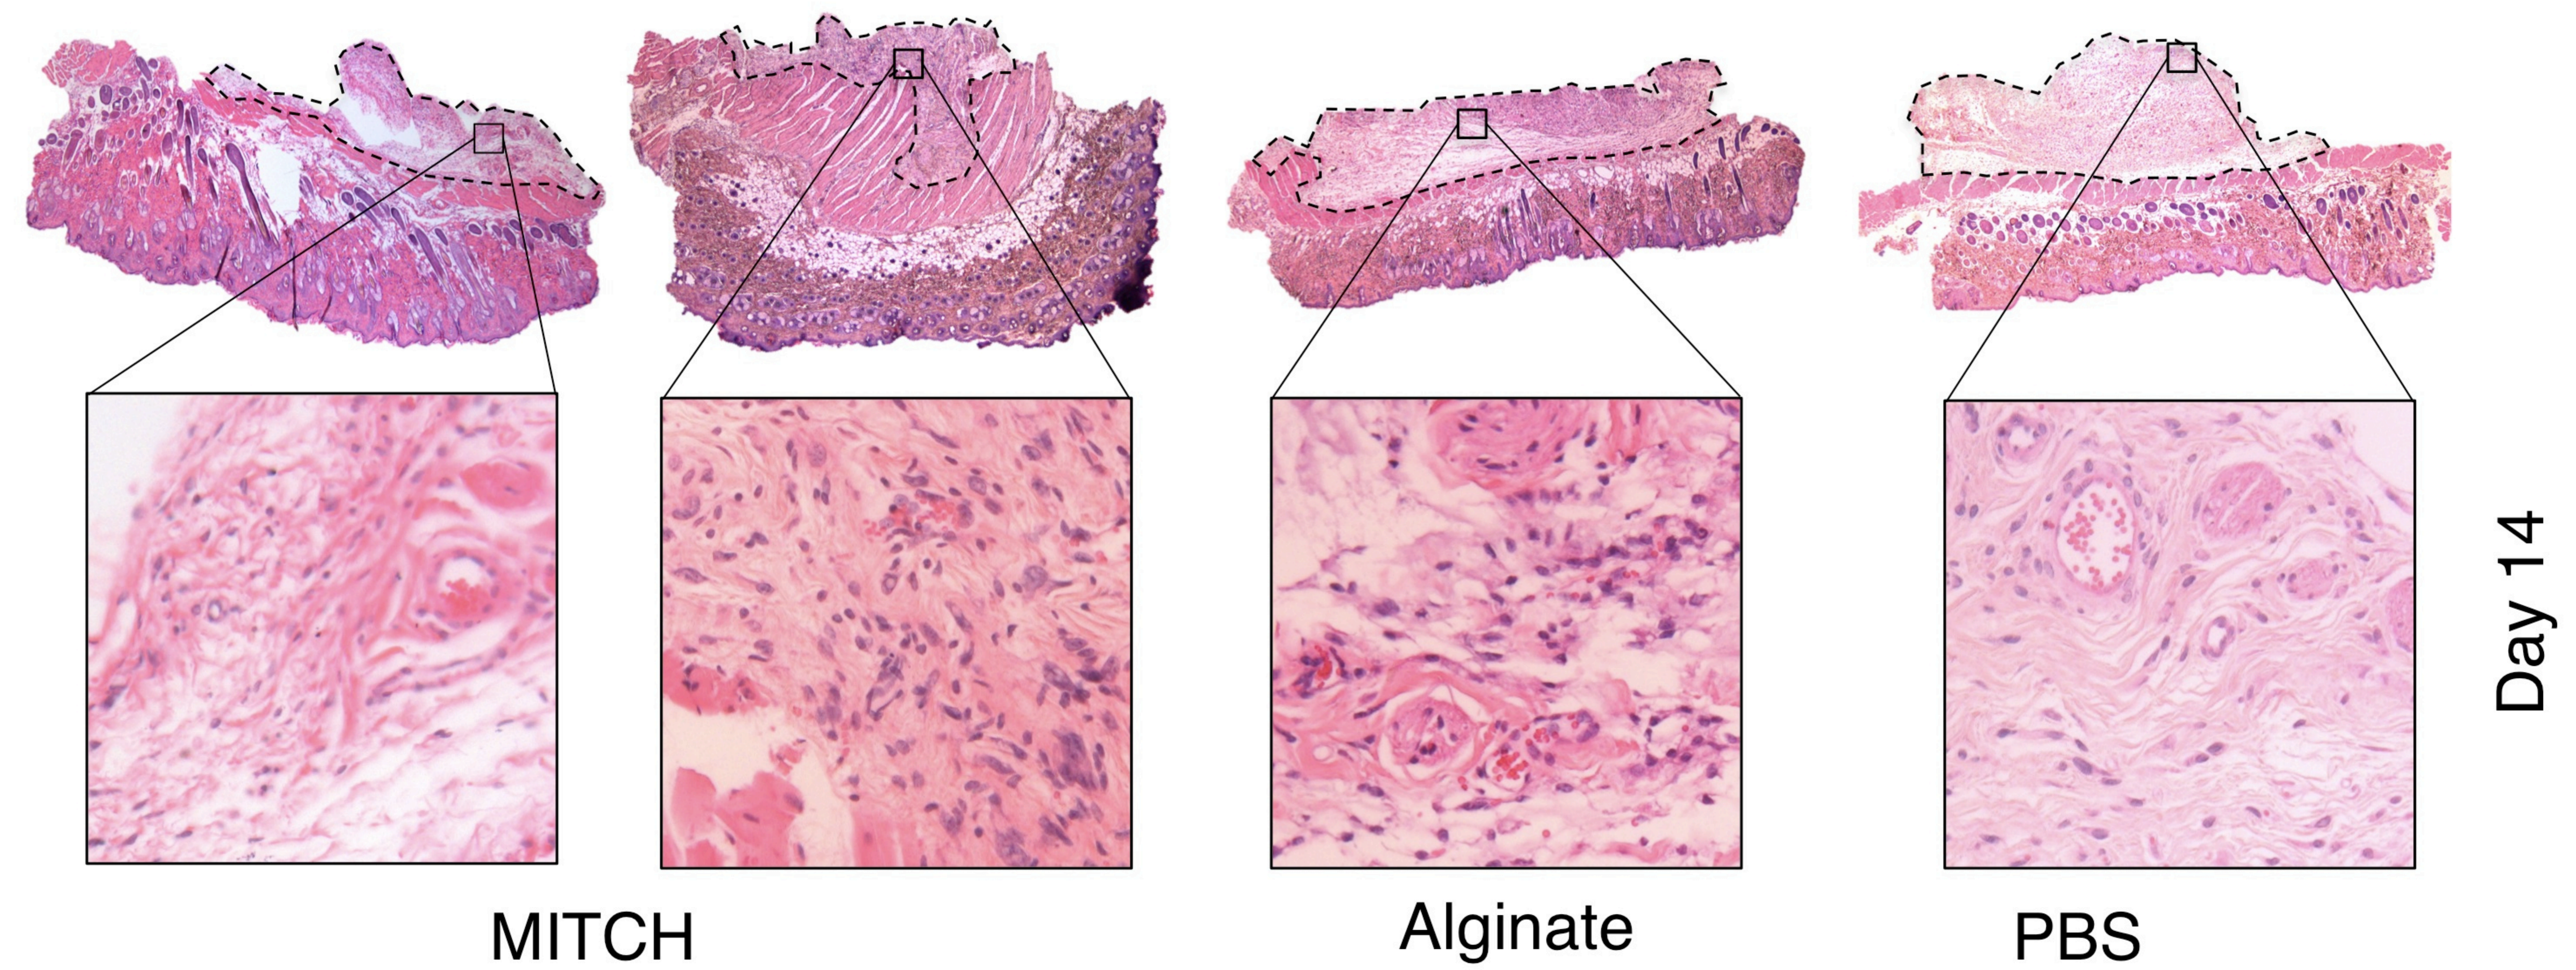

Supplement: NIHMS429090-supplement-Supplemental_Figure_2.pdf [file NIHMS429090-supplement-Supplemental_Figure_2.pdf]

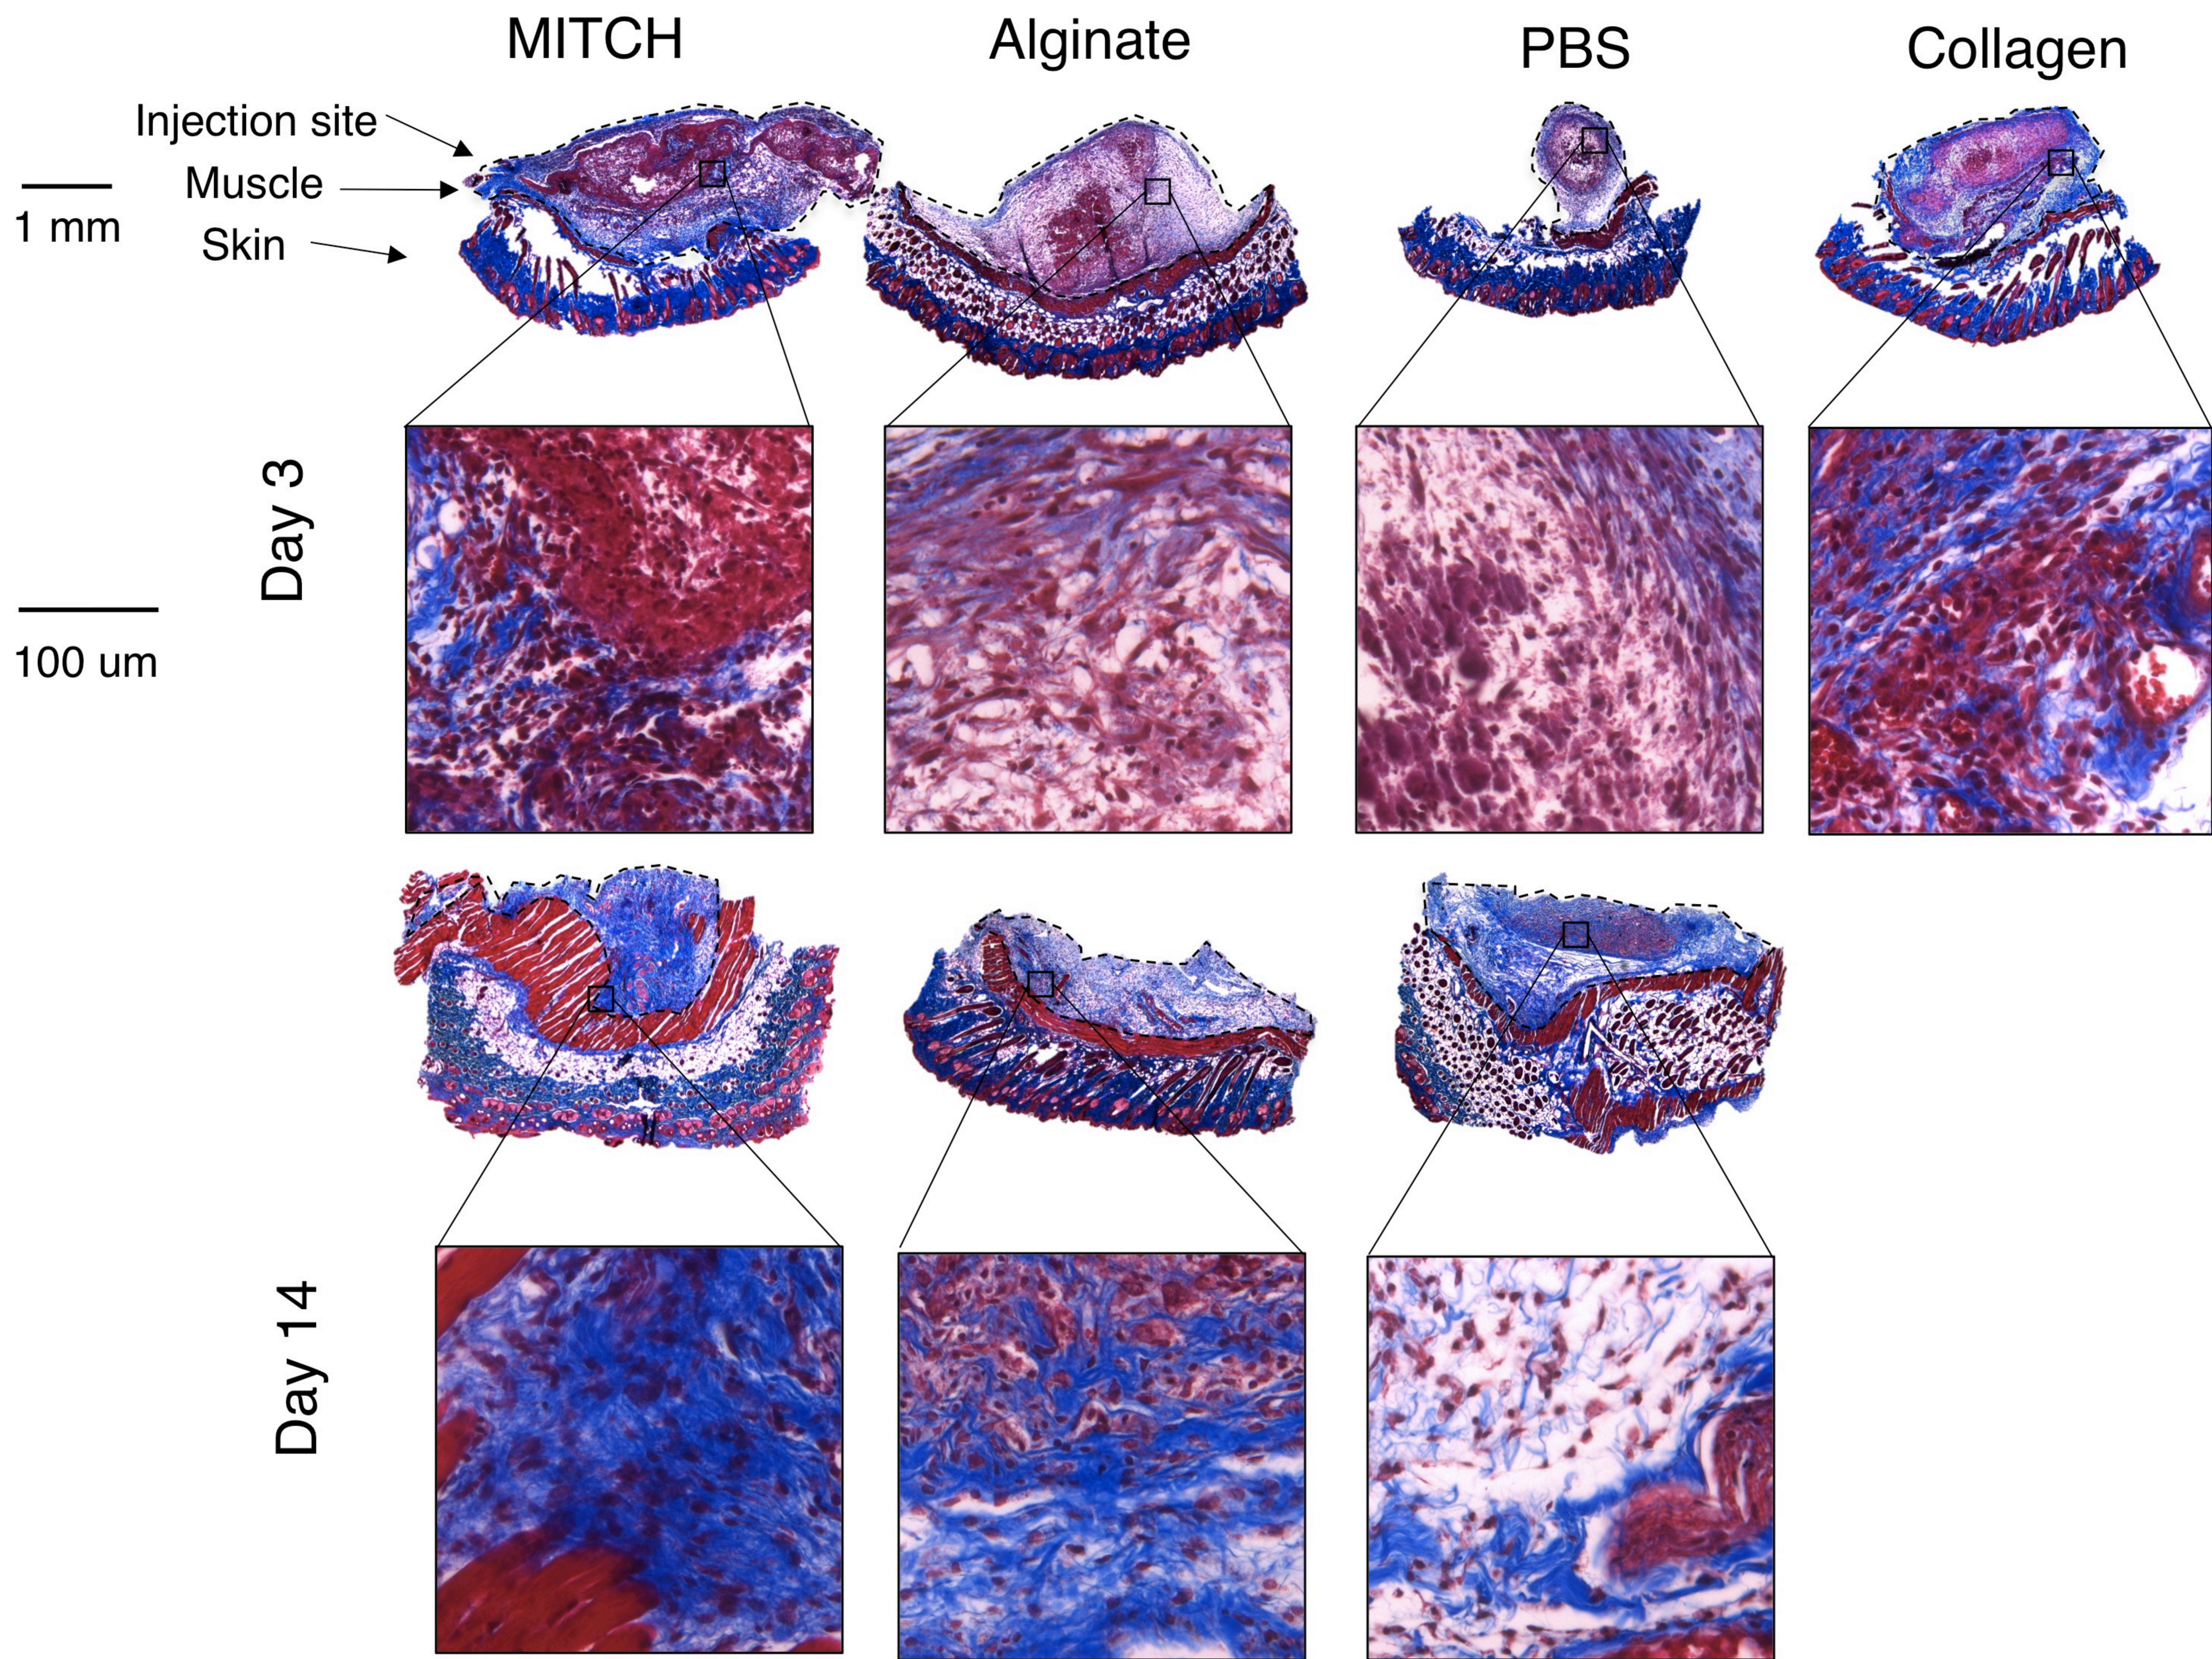

Supplement: NIHMS429090-supplement-Supplemental_Figure_3.pdf [file NIHMS429090-supplement-Supplemental_Figure_3.pdf]
